# Supplementary material for: Combination of multiple methods and views for recognition, transportation, and structure-guided modification of lysine-specific demethylase phenylcyclopropylamine inhibitor
Source: Royal Society of Chemistry journal article supplement (doi:10.1039/d2cp01197b), 2022-01-01
Supplement: d2cp01197b1.pdf [file d2cp01197b1.pdf]

## SUPPORTING INFORMATION

# Combination of multiple methods and views for recognition, transportation, structural-guided modify of lysine-specific demethylase phenylcyclopropylamine inhibitor

*Xiaoyuan Liu, Zhiyang Zhang, Nai She, Jihang Zhai, Yuan Zhao\*, Chaojie Wang\**

The Key Laboratory of Natural Medicine and Immuno-Engineering, Henan  
University, Kaifeng China

### **Corresponding Authors**

Email: [zhaoyuan@henu.edu.cn](mailto:zhaoyuan@henu.edu.cn) (Y. Zhao) ; [wcjsxq@henu.edu.cn](mailto:wcjsxq@henu.edu.cn) (C. Wang)

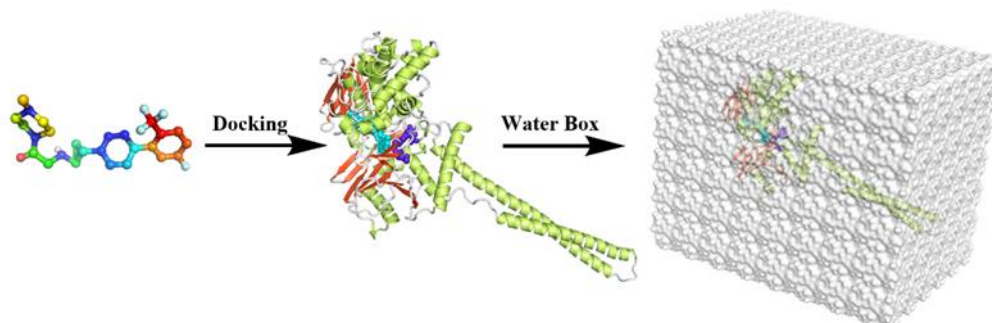

**Figure S1.** The docking process of compound 52 with the LSD1 protein and the water box of the building model.

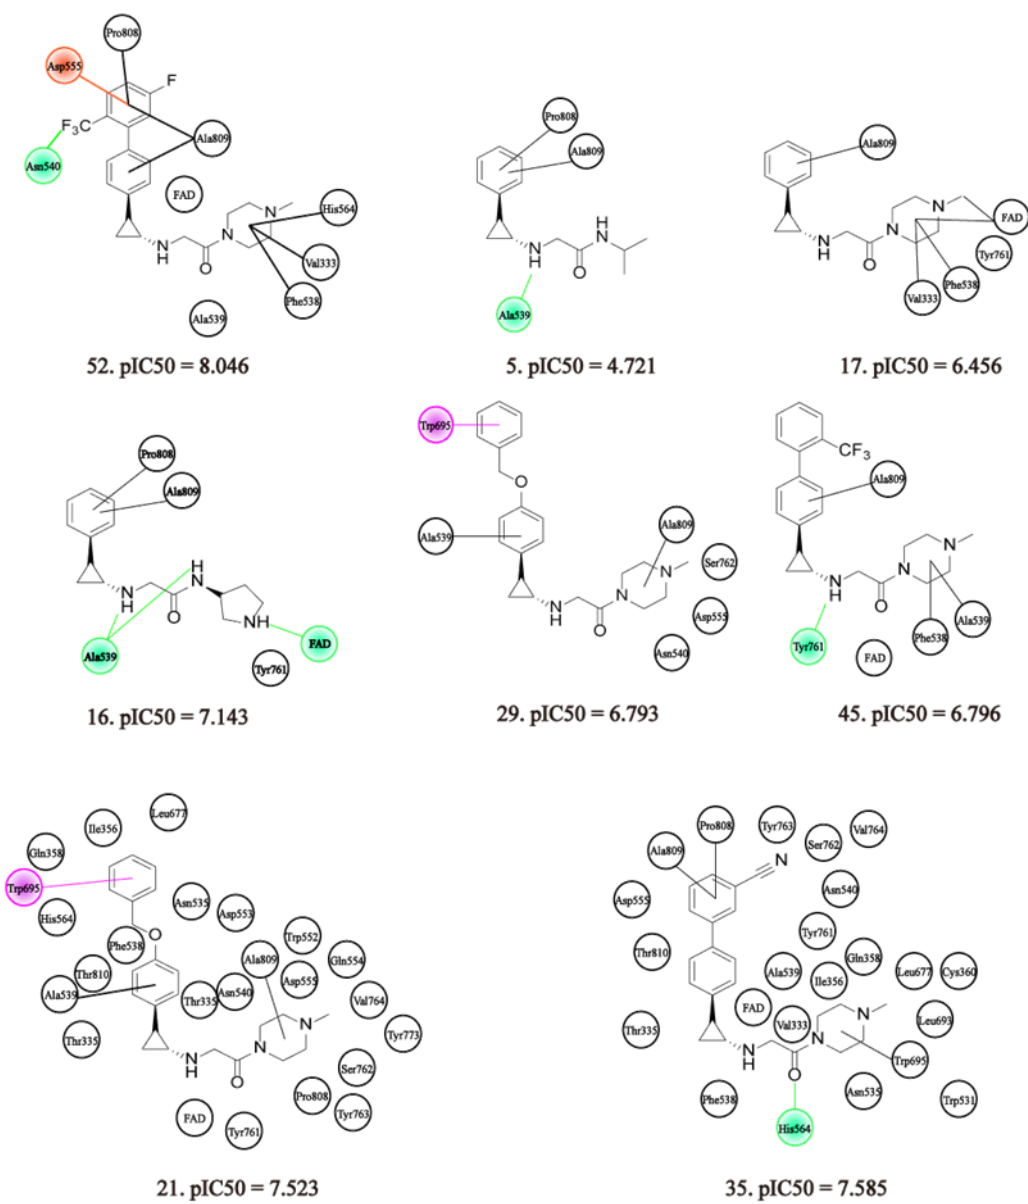

**Figure S2.** The interaction mode of the best docking configuration.

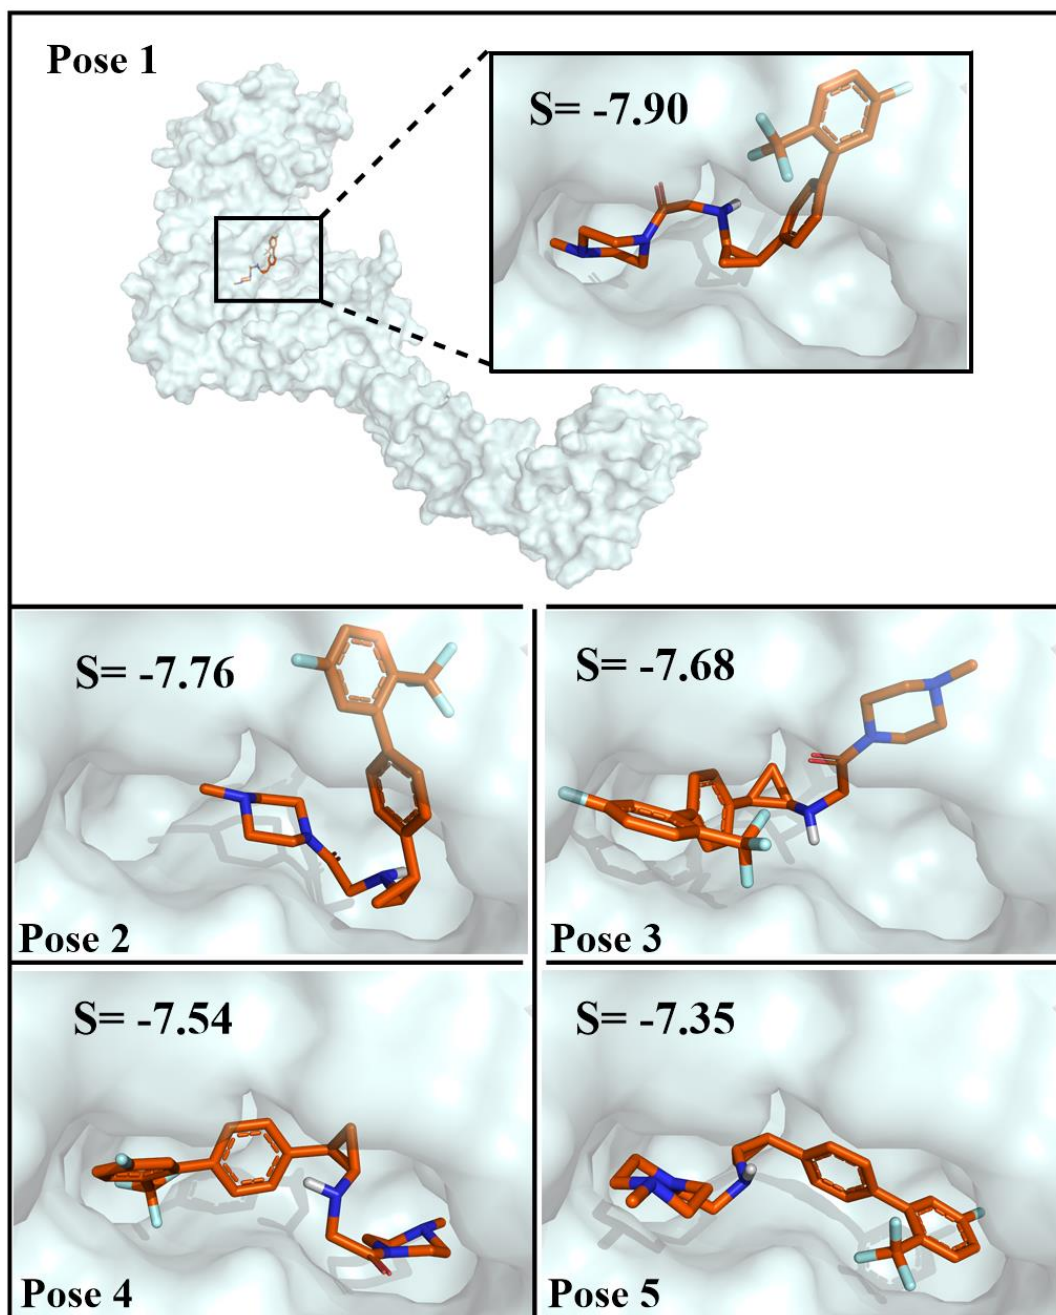

**Figure S3.** Docking scoring of different conformations of ligand 52 with LSD1.

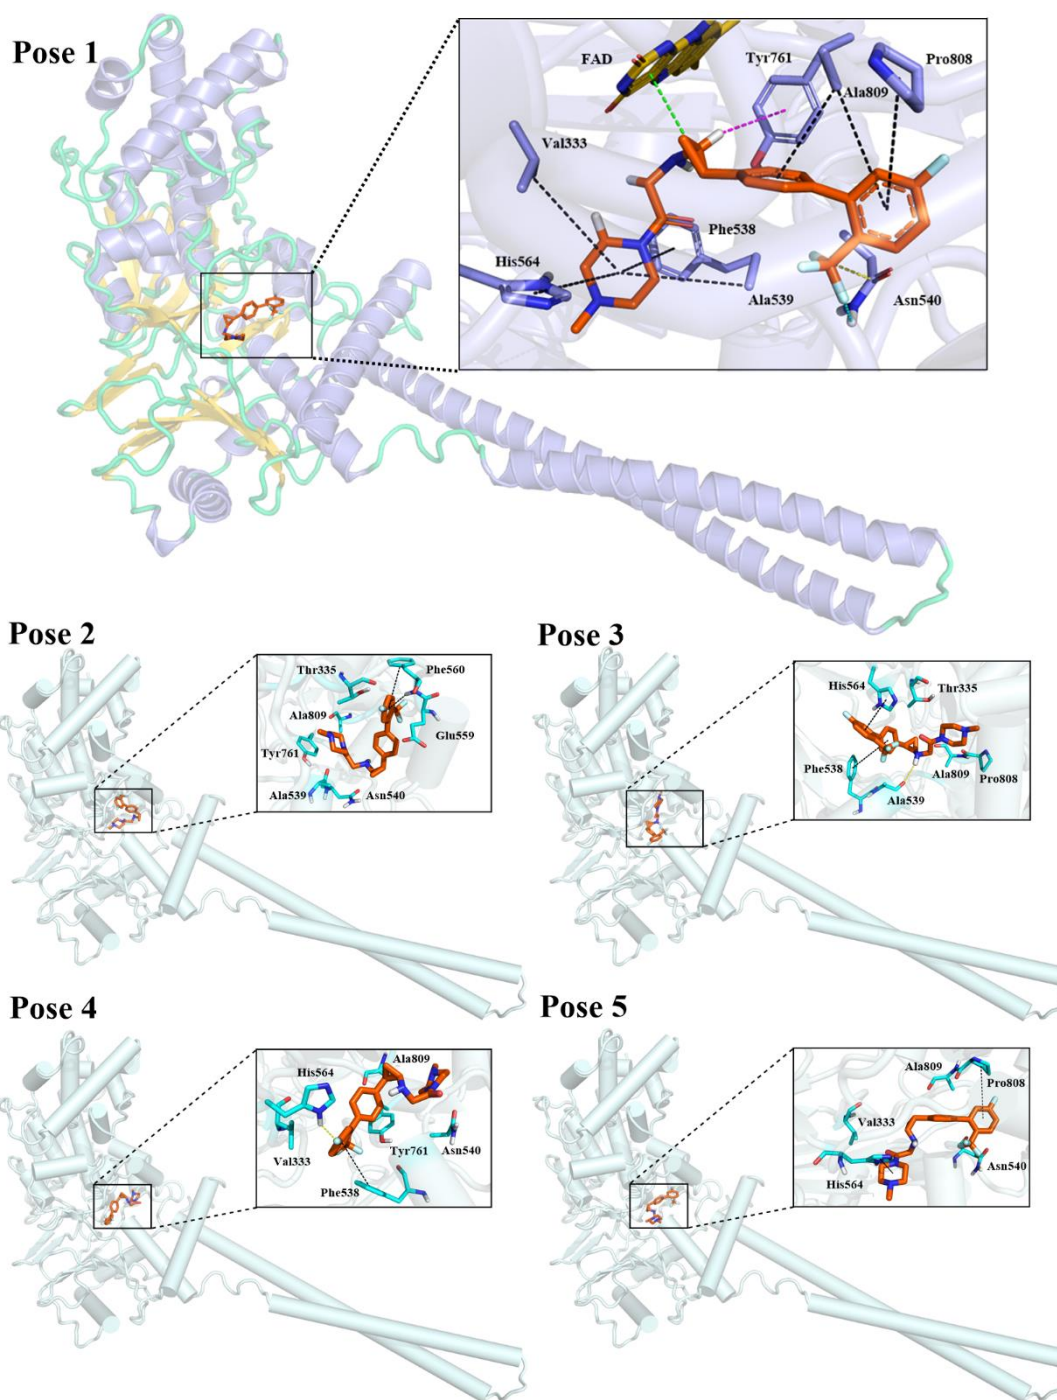

**Figure S4.** The interaction mode of the best docking configuration.

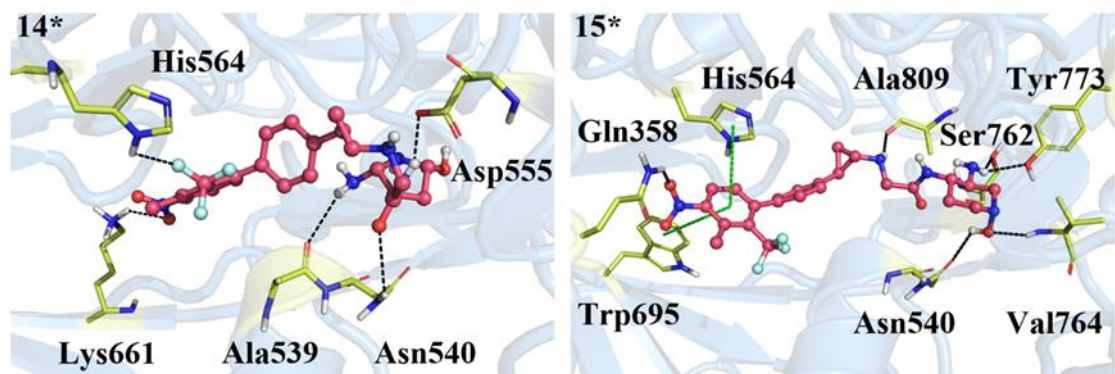

**Figure S5.** Docking interaction diagram of compounds of 14\* and 15\* with LSD1.

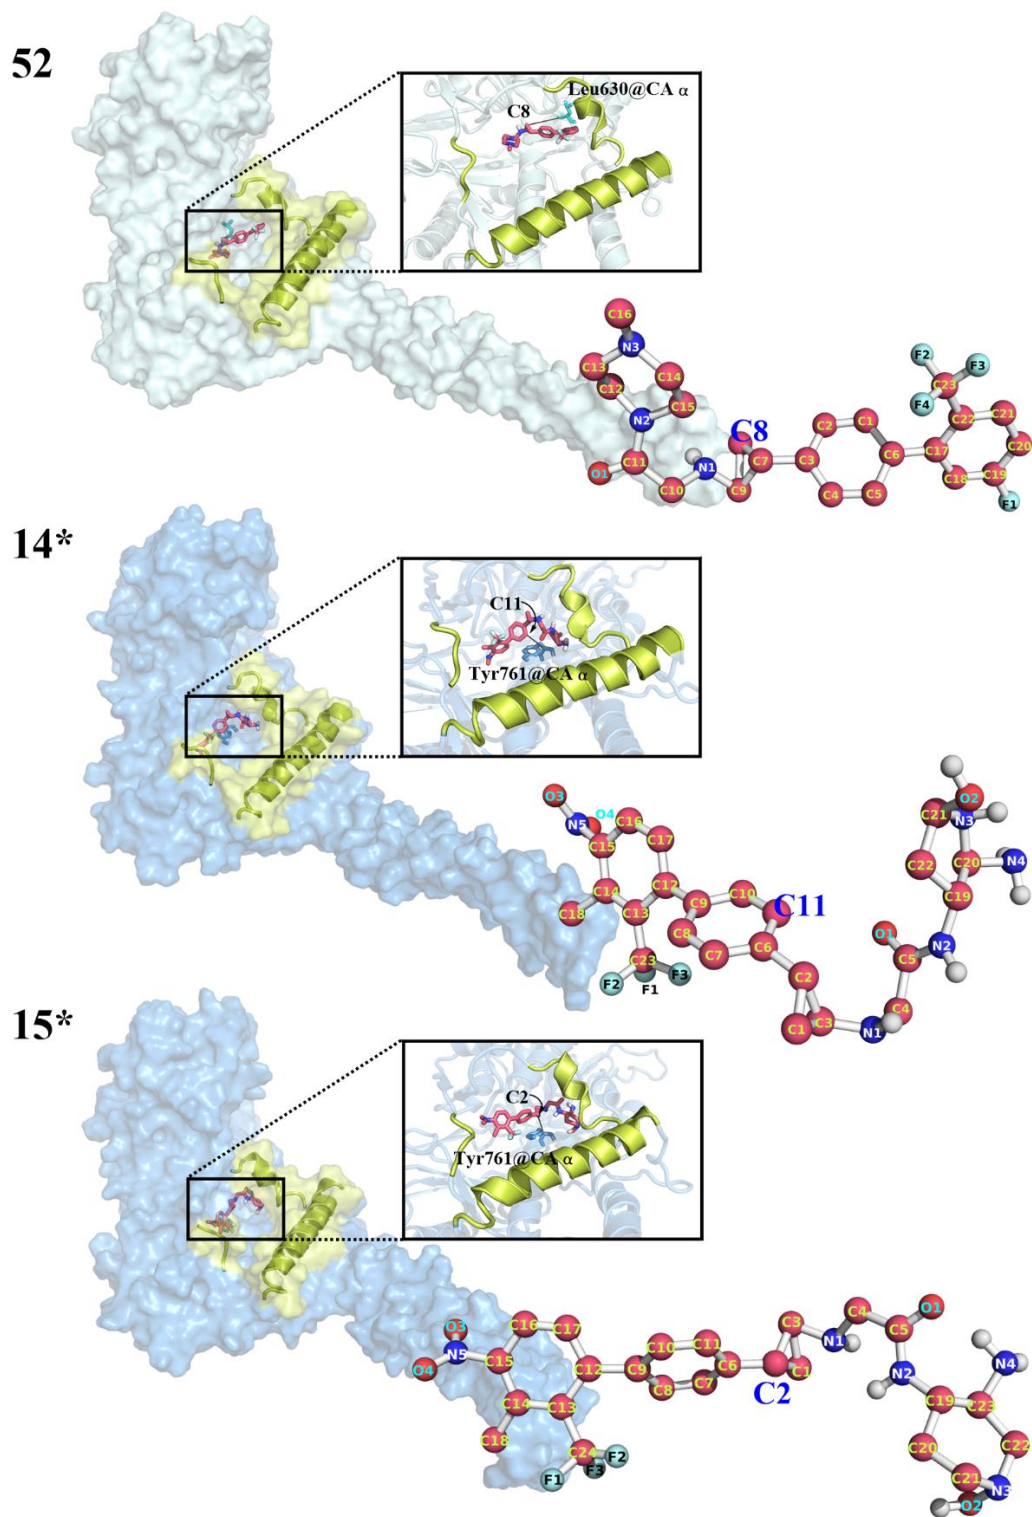

Figure S6. The pulling coordinates of P1 channel.

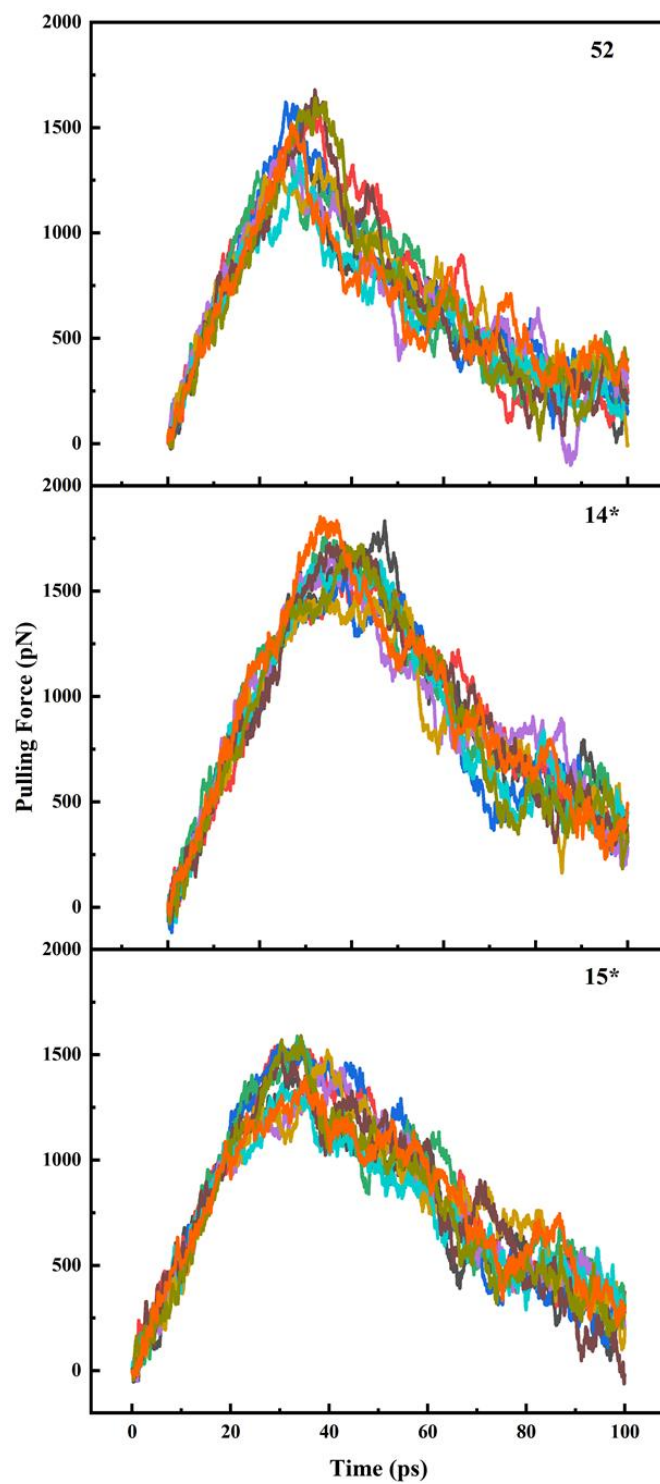

**Figure S7.** Pulling force in the release of ligands through the P1 channel.



**Table S1.** The molecular structure, corresponding experimental activity, and predicted activities obtained by 3D-QSAR for phenylcyclopropylamine class of LSD1 inhibitors selected in testing set.

| The structures' actual and predicted pIC <sub>50</sub> values of the test set |                                                                                   |                                                                                     |                |                                                                                     |                                 |                    |                     |
|-------------------------------------------------------------------------------|-----------------------------------------------------------------------------------|-------------------------------------------------------------------------------------|----------------|-------------------------------------------------------------------------------------|---------------------------------|--------------------|---------------------|
| No.                                                                           | Inhibitor structure                                                               | R <sub>1</sub>                                                                      | R <sub>2</sub> | R <sub>3</sub>                                                                      | Bioactivity(pIC <sub>50</sub> ) |                    |                     |
|                                                                               |                                                                                   |                                                                                     |                |                                                                                     | Experi-mental data              | Predicted by CoMFA | Predicted by CoMSIA |
| 14                                                                            | 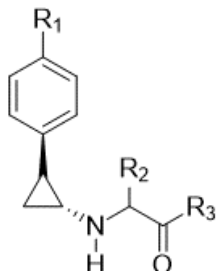 | H                                                                                   | H              |    | 8.046                           | 7.896              | 8.172               |
| 23                                                                            |                                                                                   |    | H              |    | 7.745                           | 7.280              | 7.281               |
| 29                                                                            |                                                                                   |    | H              |    | 6.793                           | 7.260              | 7.248               |
| 39                                                                            |                                                                                   |   | H              |   | 7.620                           | 8.002              | 7.760               |
| 43                                                                            |                                                                                   |  | H              |  | 7.538                           | 7.354              | 7.359               |
| 46                                                                            |                                                                                   |  | H              |  | 7.009                           | 7.335              | 7.295               |
| 47                                                                            |                                                                                   |  | H              |  | 7.398                           | 7.383              | 7.383               |
| 48                                                                            |                                                                                   |  | H              |  | 6.873                           | 7.237              | 7.274               |
| 52                                                                            |                                                                                   |  | H              |  | 8.046                           | 7.603              | 7.551               |
| 53                                                                            |                                                                                   |  | H              |  | 7.328                           | 7.298              | 7.330               |
| 54                                                                            |                                                                                   |  | H              |  | 7.602                           | 7.349              | 7.345               |

**Table S2.** Detail of MM/GBSA decomposition for 52 (All data units are kcal/mol)

| Component               | Energy            | Component                | Energy            |
|-------------------------|-------------------|--------------------------|-------------------|
| $\Delta G_{\text{vdW}}$ | $-51.54 \pm 2.30$ | $\Delta G_{\text{ele}}$  | $-10.36 \pm 5.72$ |
| $\Delta G_{\text{GB}}$  | $30.35 \pm 3.68$  | $\Delta G_{\text{SURF}}$ | $-6.20 \pm 0.24$  |
| $\Delta G_{\text{gas}}$ | $-61.90 \pm 6.55$ | $\Delta G_{\text{solv}}$ | $24.15 \pm 3.74$  |
|                         |                   | $\Delta \text{Total}$    | $-37.75 \pm 3.93$ |

**Table S3.** Detail of MM/GBSA decomposition for 14\* (All data units are kcal/mol)

| Component               | Energy             | Component                | Energy            |
|-------------------------|--------------------|--------------------------|-------------------|
| $\Delta G_{\text{vdW}}$ | $-51.12 \pm 3.35$  | $\Delta G_{\text{ele}}$  | $-59.09 \pm 8.91$ |
| $\Delta G_{\text{GB}}$  | $78.63 \pm 7.31$   | $\Delta G_{\text{SURF}}$ | $-7.23 \pm 0.18$  |
| $\Delta G_{\text{gas}}$ | $-110.20 \pm 7.67$ | $\Delta G_{\text{solv}}$ | $71.40 \pm 7.32$  |
|                         |                    | $\Delta \text{Total}$    | $-38.80 \pm 3.35$ |

**Table S4.** Detail of MM/GBSA decomposition for 15\* (All data units are kcal/mol)

| Component               | Energy            | Component                 | Energy            |
|-------------------------|-------------------|---------------------------|-------------------|
| $\Delta G_{\text{vdW}}$ | $-49.33 \pm 2.74$ | $\Delta G_{\text{ele}}$   | $-29.51 \pm 5.66$ |
| $\Delta G_{\text{GB}}$  | $53.87 \pm 6.01$  | $\Delta G_{\text{SURF}}$  | $-7.00 \pm 0.34$  |
| $\Delta G_{\text{gas}}$ | $-78.84 \pm 6.30$ | $\Delta G_{\text{solv}}$  | $46.87 \pm 5.88$  |
|                         |                   | $\Delta G_{\text{Total}}$ | $-31.97 \pm 3.66$ |
